# Supplementary material for: Effects of allopurinol on renal function in patients with diabetes: a systematic review and meta-analysis
Source: PubMed Central journal article supplement (PMC9307109; doi:10.1080/0886022x.2022.2068443), 2022-07-20
Supplement: IRNF_A_2068443_SM5394.pdf [file IRNF_A_2068443_SM5394.pdf]

Author(s):

Question: Allopurinol compared to Placebo or Conventional group for hyperuricemia in diabetes mellitus

Setting:

Bibliography: Allopurinol for hyperuricemia in diabetes mellitus. Cochrane Database of Systematic Reviews [Year], Issue [Issue].

| Certainty assessment                                                          |                   |              |               |              |             |                      | No of patients |                               | Effect            |                                                          | Certainty        | Importance |
|-------------------------------------------------------------------------------|-------------------|--------------|---------------|--------------|-------------|----------------------|----------------|-------------------------------|-------------------|----------------------------------------------------------|------------------|------------|
| No of studies                                                                 | Study design      | Risk of bias | Inconsistency | Indirectness | Imprecision | Other considerations | Allopurinol    | Placebo or Conventional group | Relative (95% CI) | Absolute (95% CI)                                        |                  |            |
| <b>24-hour urine protein</b>                                                  |                   |              |               |              |             |                      |                |                               |                   |                                                          |                  |            |
| 4                                                                             | randomised trials | serious      | not serious   | not serious  | not serious | none                 | 158            | 150                           | -                 | MD <b>493.61 lower</b><br>(679.61 lower to 307.61 lower) | ⊕⊕⊕○<br>Moderate |            |
| <b>subgroup analysis- Serum uric acid</b>                                     |                   |              |               |              |             |                      |                |                               |                   |                                                          |                  |            |
| 10                                                                            | randomised trials | serious      | serious       | not serious  | not serious | none                 | 446            | 420                           | -                 | SMD <b>2.32 lower</b><br>(3.29 lower to 1.35 lower)      | ⊕⊕○○<br>Low      |            |
| <b>subgroup analysis- Serum uric acid - Allopurinol vs Placebo</b>            |                   |              |               |              |             |                      |                |                               |                   |                                                          |                  |            |
| 4                                                                             | randomised trials | serious      | serious       | not serious  | not serious | none                 | 165            | 163                           | -                 | SMD <b>1.05 lower</b><br>(1.42 lower to 0.68 lower)      | ⊕⊕○○<br>Low      |            |
| <b>subgroup analysis- Serum uric acid - Allopurinol vs Conventional group</b> |                   |              |               |              |             |                      |                |                               |                   |                                                          |                  |            |
| 6                                                                             | randomised trials | serious      | serious       | not serious  | not serious | none                 | 281            | 257                           | -                 | SMD <b>3.23 lower</b><br>(4.88 lower to 1.59 lower)      | ⊕⊕○○<br>Low      |            |
| <b>Serum creatinine</b>                                                       |                   |              |               |              |             |                      |                |                               |                   |                                                          |                  |            |
| 5                                                                             | randomised trials | serious      | not serious   | not serious  | not serious | none                 | 250            | 231                           | -                 | SMD <b>0.45 lower</b><br>(0.96 lower to 0.06 higher)     | ⊕⊕⊕○<br>Moderate |            |
| <b>Serum creatinine - treatment duration ≥ 6 months</b>                       |                   |              |               |              |             |                      |                |                               |                   |                                                          |                  |            |
| 3                                                                             | randomised trials | serious      | not serious   | not serious  | not serious | none                 | 191            | 174                           | -                 | SMD <b>0.51 lower</b><br>(1.33 lower to 0.32 higher)     | ⊕⊕⊕○<br>Moderate |            |
| <b>Serum creatinine - treatment duration &lt; 6 months</b>                    |                   |              |               |              |             |                      |                |                               |                   |                                                          |                  |            |
| 2                                                                             | randomised trials | serious      | not serious   | not serious  | not serious | none                 | 59             | 57                            | -                 | SMD <b>0.41 lower</b><br>(0.77 lower to 0.04 lower)      | ⊕⊕⊕○<br>Moderate |            |

CI: confidence interval; MD: mean difference; SMD: standardised mean difference
